# Supplementary material
Source: publisher figshare collection journal article supplement (https://acs.figshare.com/ndownloader/files/4092724)
Supplement: Supplementary file 1 [file 4092724]

*Supporting information for*

# Corona-treated polyethylene films are macroscopic charge bilayers

Leandra P. Santos<sup>†</sup>, Juliana S. Bernardes<sup>†§</sup>, Fernando Galembeck<sup>†§</sup>

<sup>†</sup>Institute of Chemistry, University of Campinas - UNICAMP, P.O. Box 6154, Campinas SP, Brazil  
13083-970.

<sup>§</sup>National Nanotechnology Laboratory at the National Center for Energy and Materials Research,  
Campinas SP, Brazil 13083-970.

## **ATR infrared spectrum**

ATR infrared spectrum was obtained using a *Smiths IlluminatIR II* instrument coupled to an *Olympus BX51* microscope. The LDPE was identified according to the *Sadtler* infrared database.

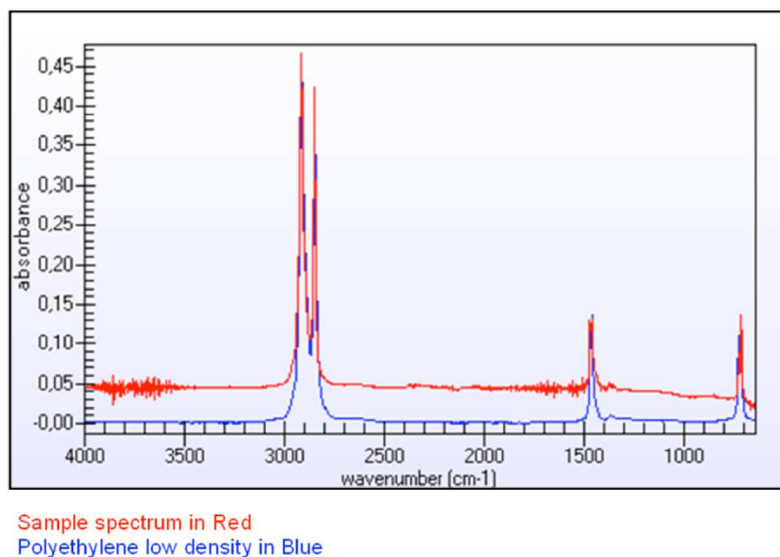

**Figure S1.** ATR infrared spectra for the polymeric film used in this work (red line) and for LDPE standard sample.

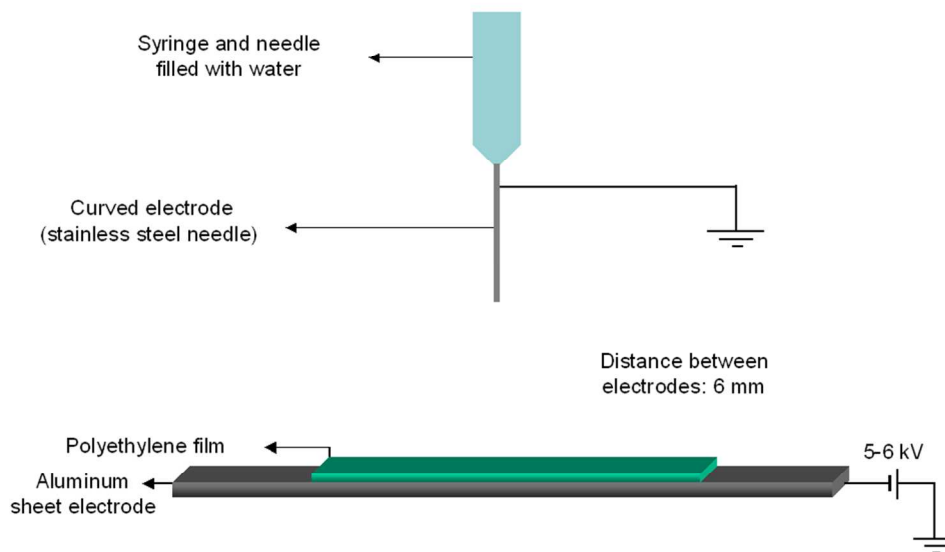

**Figure S2.** Schematic diagram of inverted corona apparatus used to charge polyethylene films.

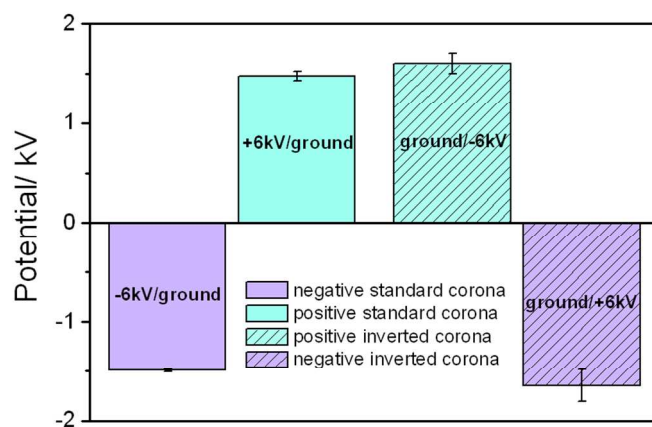

**Figure S3.** Electrostatic surface potential measured on the surface of polyethylene films facing the needle electrode. Voltage applied to curved/plate electrodes is indicated within the bars. The two bars to the left (right) correspond to standard (inverted) corona arrangement.

## Ion efficiency removal

The ion efficiency removal ( $E$ ) was calculated using the equation (1):

$$E = \frac{V_i - V_f}{V_i} \quad \text{Eq.(1)}$$

where  $V_i$  is the electrostatic potential of corona-treated PE film and  $V_f$  is the electrostatic potential measured after solvent rising.

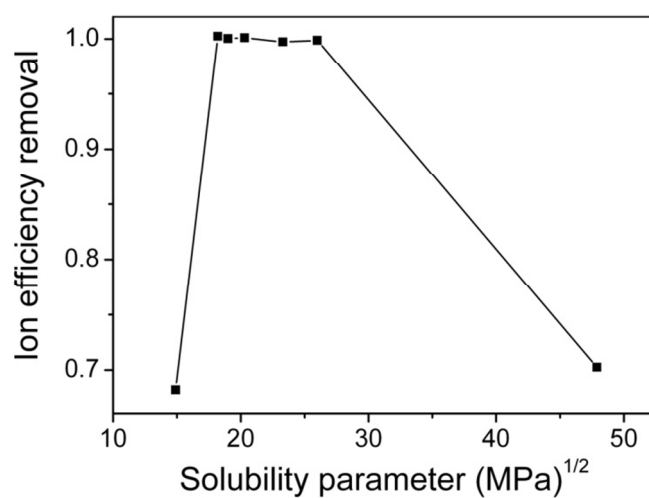

**Figure S4.** Ion efficiency removal by solvents as a function of Hildebrand solubility parameter.

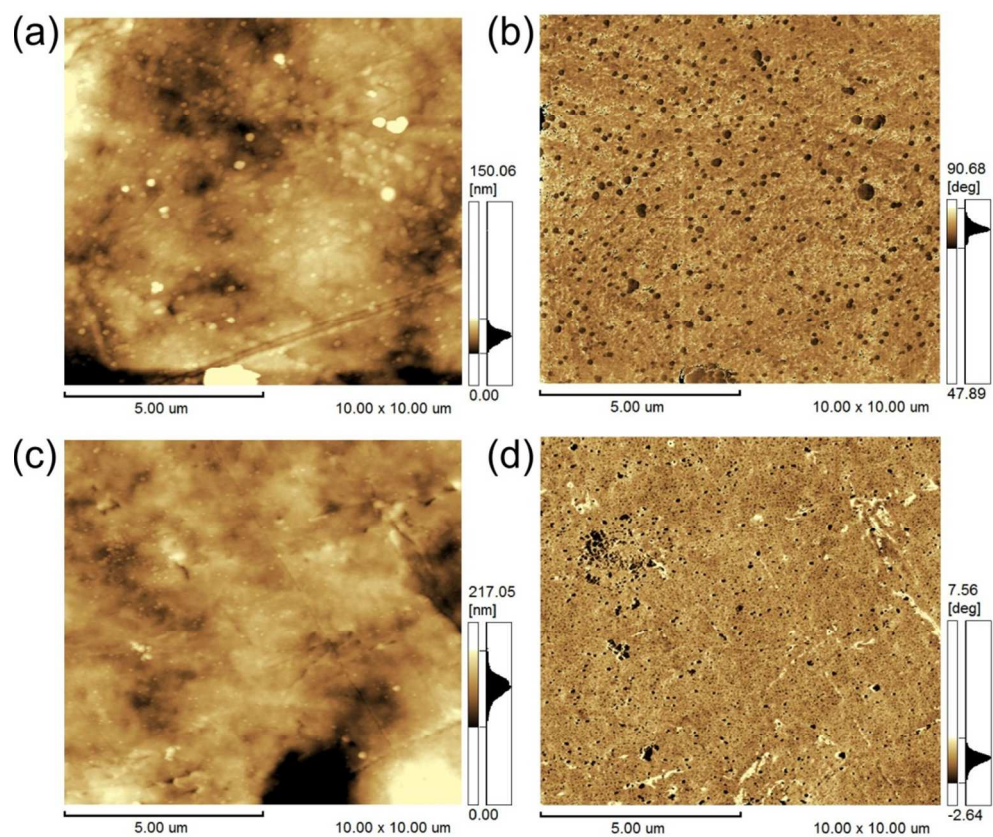

**Figure S5.** Topography (left) and phase contrast (right) images of polyethylene top surface acquired (a-b) 1 hour and (c-d) 24 hours after positive inverted corona discharge.
